# Supplementary material
Source: publisher figshare collection journal article supplement (https://acs.figshare.com/ndownloader/files/21701532)
Supplement: Supplementary file 1 [file 21701532]

# Supporting Information

# Controlled Release of Hydrogen Isotopes from Hydride-Magnetic Nanomaterials

*Simona E. Hunyadi Murph,<sup>\*,†,§</sup> Kaitlin Coopersmith,<sup>±</sup> Henry T. Sessions, Jr.,<sup>‡</sup> Michael Brown<sup>‡</sup>  
and George Larsen<sup>±</sup>*

<sup>†</sup>Environmental, Materials & Energy Sciences Directorate, Aiken, SC USA

<sup>±</sup>National Security Directorate, Savannah River National Laboratory, Aiken, SC USA

<sup>‡</sup>Science and Technology Directorate, Aiken, SC USA

<sup>§</sup>Department of Physics and Astronomy, University of Georgia, Athens, GA USA

\*Corresponding author, email address: [Simona.Murph@srnl.doe.gov](mailto:Simona.Murph@srnl.doe.gov), phone: 803-646-6761

KEYWORDS: hydrogen absorption, hydride-magnetic nanomaterials, magnetic induced heating

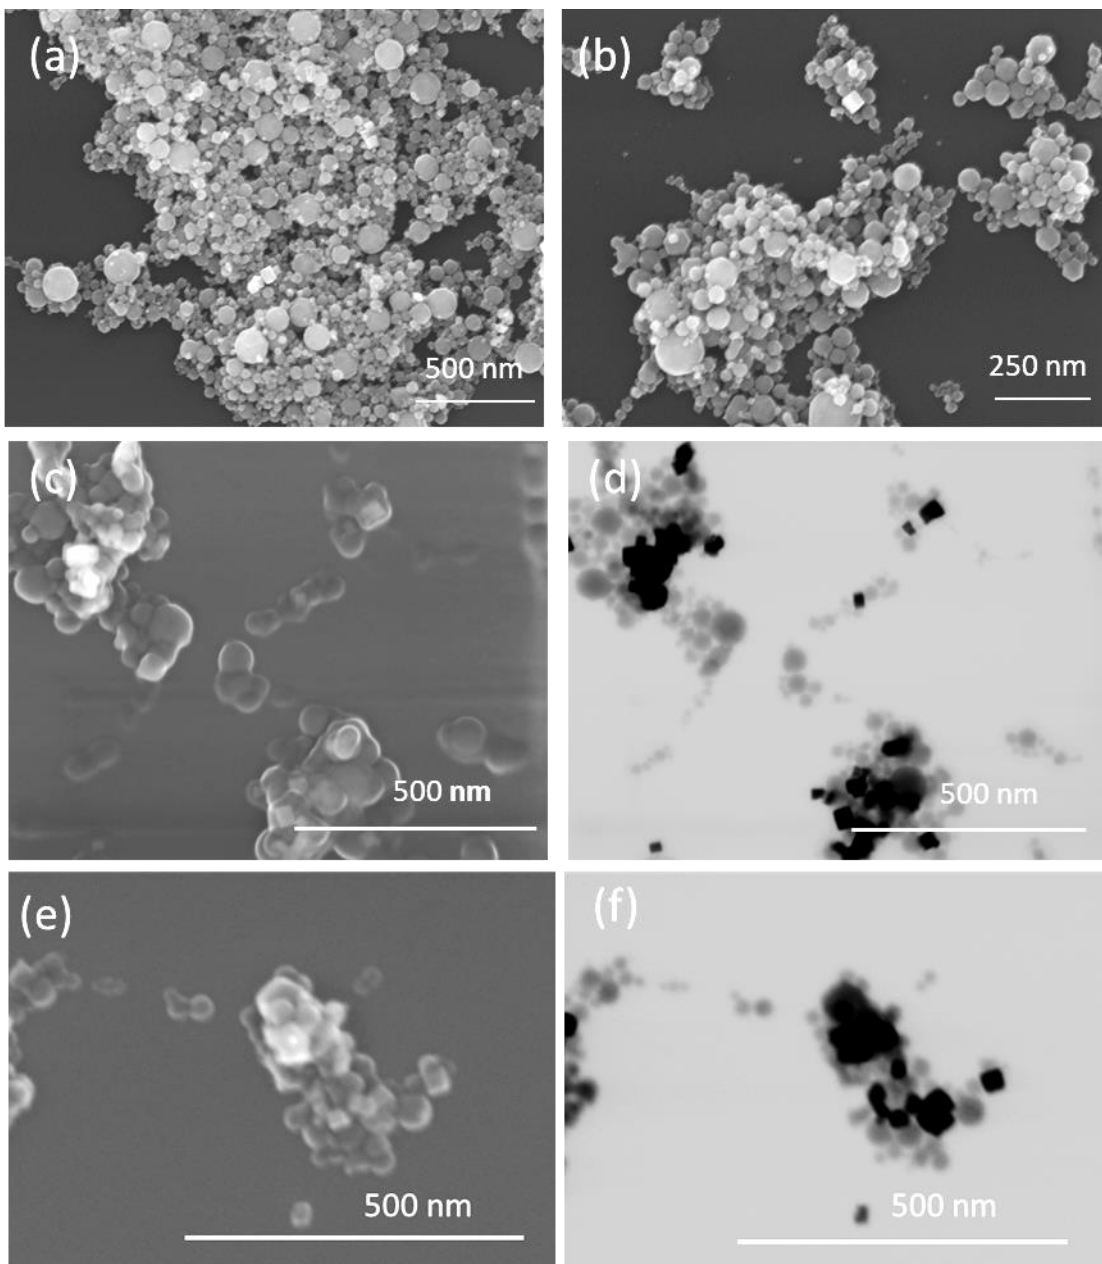

**Figure S1.** (a, b, c, e) SEM images of  $\text{Fe}_2\text{O}_3\text{-Pd}$  nanostructures, (d, e) SEM images collected using backscattered electron imaging of  $\text{Fe}_2\text{O}_3\text{-Pd}$  nanostructures.

## Isotherm on Palladium Nanoparticles

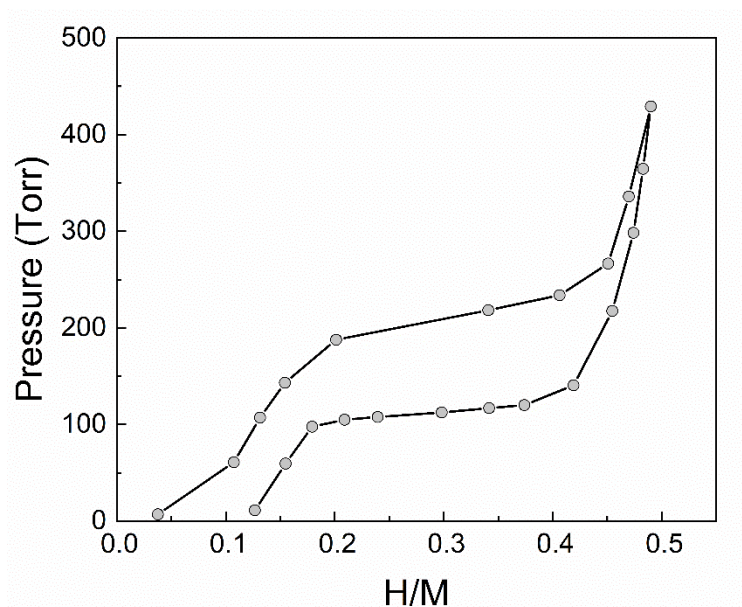

**Figure S2.** Protium absorption and desorption isotherm collected at 90 °C on palladium nanoparticles of < 25 nm in diameter (purchased from sigma-aldrich). Compared to the Fe<sub>2</sub>O<sub>3</sub>-Pd, the Pd nanoparticles shows comparable capacity of H/M=0.46.

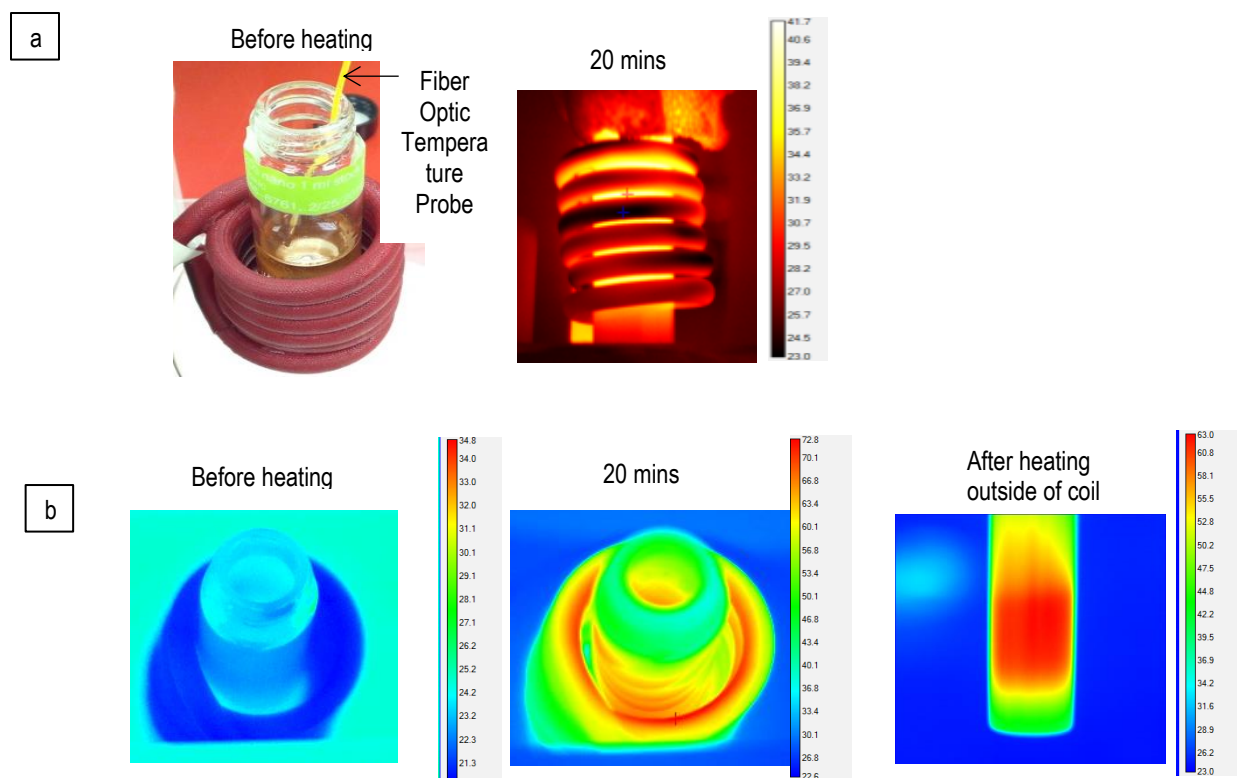

**Figure S3.** Photographs and IR heating rate and thermal energy balance profiles of aqueous solutions of  $\text{Fe}_2\text{O}_3$  NPs **(a)** side view, before -left- and after 20 minutes heating -right- with the magnetic induced heating device; and **(b)** top view, before and after 20 minutes heating with the alternating magnetic induced heating device (left and center); sample vials after 20 minutes heating outside the coil (right).

### **Calculation of Hydrogen concentration**

The concentration of the hydrogen concentration in the overhead pressure in the capillaries was calculated based on eq. 1:

$$n = \frac{PV}{RT} \quad (1)$$

Where n is the number of moles, P is the overhead pressure, R is the gas constant, and T is temperature of the capillaries.
